# Supplementary material for: Evaluation of [18F]-FDG-Based Hybrid Imaging Combinations for Assessment of Bone Marrow Involvement in Lymphoma at Initial Staging
Source: PubMed Central journal article supplement (PMC5056699; doi:10.1371/journal.pone.0164118), 2016-10-10
Supplement: pone.0164118.s001.pdf [file pone.0164118.s001.pdf]

| PatID | Consensus | Histo | PETCTr1 | PET+DWIr1 | PETT1r1 | PETCTr2 |   |
|-------|-----------|-------|---------|-----------|---------|---------|---|
| 1     | 1         | 1     | 0       | 1         | 1       | 1       | 1 |
| 2     | 1         | 1     | 0       | 0         | 1       | 1       | 1 |
| 3     | 0         | 0     | 0       | 0         | 0       | 0       | 0 |
| 4     | 0         | 0     | 0       | 0         | 0       | 0       | 0 |
| 5     | 0         | 0     | 0       | 0         | 0       | 0       | 0 |
| 6     | 0         | 0     | 0       | 0         | 0       | 0       | 0 |
| 7     | 0         | 0     | 0       | 0         | 0       | 0       | 0 |
| 8     | 1         | 1     | 1       | 0         | 1       | 1       | 1 |
| 9     | 0         | 0     | 0       | 0         | 0       | 0       | 0 |
| 10    | 0         | 0     | 0       | 0         | 0       | 0       | 0 |
| 11    | 1         | 1     | 1       | 1         | 1       | 1       | 1 |
| 12    | 0         | 0     | 0       | 0         | 0       | 1       | 0 |
| 13    | 0         | 0     | 0       | 0         | 0       | 0       | 0 |
| 14    | 0         | 0     | 0       | 0         | 0       | 0       | 0 |
| 15    | 0         | 0     | 0       | 1         | 0       | 0       | 0 |
| 16    | 0         | 0     | 0       | 0         | 0       | 0       | 0 |
| 17    | 0         | 0     | 0       | 0         | 0       | 0       | 0 |
| 18    | 1         | 1     | 1       | 1         | 1       | 1       | 1 |
| 19    | 0         | 0     | 0       | 0         | 0       | 0       | 0 |
| 20    | 0         | 0     | 0       | 0         | 0       | 0       | 0 |
| 21    | 0         | 0     | 0       | 0         | 0       | 0       | 0 |
| 22    | 1         | 1     | 1       | 1         | 1       | 1       | 1 |
| 23    | 0         | 0     | 0       | 1         | 1       | 0       | 1 |
| 24    | 1         | 1     | 0       | 1         | 1       | 1       | 1 |
| 25    | 0         | 0     | 0       | 0         | 0       | 0       | 0 |
| 26    | 0         | 0     | 0       | 0         | 0       | 0       | 0 |
| 27    | 0         | 0     | 0       | 0         | 0       | 0       | 0 |
| 28    | 1         | 1     | 1       | 1         | 1       | 1       | 1 |
| 29    | 0         | 0     | 0       | 1         | 1       | 0       | 0 |
| 30    | 1         | 1     | 1       | 1         | 1       | 0       | 0 |
| 31    | 1         | 1     | 1       | 0         | 0       | 0       | 0 |
| 32    | 0         | 0     | 0       | 0         | 0       | 0       | 0 |
| 33    | 0         | 0     | 0       | 0         | 0       | 0       | 0 |
| 34    | 0         | 0     | 0       | 0         | 0       | 1       | 0 |
| 35    | 0         | 0     | 0       | 0         | 0       | 0       | 0 |
| 36    | 0         | 0     | 0       | 0         | 0       | 0       | 0 |
| 37    | 0         | 0     | 0       | 0         | 0       | 0       | 0 |
| 38    | 0         | 0     | 0       | 0         | 0       | 0       | 0 |
| 39    | 0         | 0     | 0       | 0         | 0       | 0       | 0 |
| 40    | 0         | 0     | 0       | 0         | 0       | 0       | 0 |
| 41    | 0         | 0     | 0       | 0         | 0       | 0       | 0 |
| 42    | 0         | 0     | 0       | 0         | 0       | 0       | 0 |
| 43    | 1         | 1     | 1       | 1         | 0       | 0       | 0 |
| 44    | 0         | 0     | 0       | 0         | 0       | 0       | 0 |
| 45    | 0         | 0     | 0       | 0         | 0       | 0       | 0 |

|    |   |   |   |   |   |   |
|----|---|---|---|---|---|---|
| 46 | 0 | 0 | 0 | 0 | 0 | 0 |
| 47 | 0 | 0 | 1 | 1 | 1 | 1 |
| 48 | 1 | 0 | 1 | 1 | 1 | 1 |
| 49 | 1 | 1 | 1 | 1 | 1 | 1 |
| 50 | 0 | 0 | 0 | 0 | 0 | 0 |
| 51 | 0 | 0 | 0 | 0 | 0 | 0 |
| 52 | 1 | 1 | 1 | 1 | 1 | 1 |
| 53 | 0 | 0 | 0 | 0 | 0 | 0 |
| 54 | 1 | 1 | 0 | 1 | 0 | 1 |
| 55 | 0 | 0 | 0 | 0 | 0 | 0 |
| 56 | 1 | 1 | 0 | 0 | 0 | 1 |
| 57 | 0 | 0 | 0 | 0 | 0 | 0 |
| 58 | 0 | 0 | 0 | 0 | 0 | 0 |
| 59 | 0 | 0 | 0 | 0 | 0 | 0 |
| 60 | 0 | 0 | 0 | 0 | 0 | 0 |



|   |   |   |   |   |   |   |
|---|---|---|---|---|---|---|
| 0 | 0 | 0 | 0 | 0 | 0 | 0 |
| 1 | 0 | 0 | 0 | 2 | 2 | 2 |
| 1 | 1 | 1 | 0 | 1 | 1 | 1 |
| 1 | 1 | 2 | 1 | 2 | 2 | 2 |
| 0 | 0 | 0 | 0 | 0 | 0 | 0 |
| 0 | 0 | 0 | 0 | 0 | 0 | 0 |
| 1 | 1 | 1 | 1 | 1 | 1 | 1 |
| 0 | 0 | 0 | 0 | 0 | 0 | 0 |
| 1 | 1 | 1 | 1 | 0 | 1 | 0 |
| 0 | 0 | 0 | 0 | 0 | 0 | 0 |
| 1 | 1 | 2 | 1 | 0 | 0 | 0 |
| 0 | 0 | 0 | 0 | 0 | 0 | 0 |
| 0 | 0 | 0 | 0 | 0 | 0 | 0 |
| 0 | 0 | 0 | 0 | 0 | 0 | 0 |
| 0 | 0 | 0 | 0 | 0 | 0 | 0 |



|   |   |   |
|---|---|---|
| 0 | 0 | 0 |
| 2 | 2 | 0 |
| 1 | 1 | 1 |
| 2 | 2 | 2 |
| 0 | 0 | 0 |
| 0 | 0 | 0 |
| 1 | 1 | 1 |
| 0 | 0 | 0 |
| 1 | 1 | 1 |
| 0 | 0 | 0 |
| 2 | 2 | 2 |
| 0 | 0 | 0 |
| 0 | 0 | 0 |
| 0 | 0 | 0 |
| 0 | 0 | 0 |
